# Supplementary material for: A correlation–relaxation-balanced direct method at the second order perturbation theory for accurate ionization potential predictions
Source: Royal Society of Chemistry journal article supplement (doi:10.1039/d0cp03430d), 2020-01-01
Supplement: d0cp03430d1.pdf [file d0cp03430d1.pdf]

Supporting Information of

**A Correlation-Relaxation-Balanced Direct Method at the  
Second Order Perturbation Theory for Accurate Ionization  
Potential Predictions**

Yonghao Gu and Xin Xu

*Collaborative Innovation Center of Chemistry for Energy Materials, Shanghai Key  
Laboratory of Molecular Catalysis and Innovative Materials, Ministry of Education Key  
Laboratory of Computational Physical Sciences, Department of Chemistry, Fudan University,  
Shanghai, 200433, China*

## Supplemental test results

Here list the detailed test results of the first IPs (Table S1), valence IPs (Table S2) and core IPs (Table S3) calculated by MP2-based direct methods. The data set of the first IP was taken from Ref 1. The cc-pVQZ<sup>2, 3</sup> basis set was used as it was in Ref 1. The data sets of valence and core IPs were taken from Ref. 4. The aug-cc-pVTZ<sup>2, 3</sup> basis set was used as it was in Ref. 4. The small positive number (SPN<sup>5</sup>) approximation was used for all EKT-MP2 calculations to cure the negative occupation number problems. All calculations were performed with a locally modified version of the GAUSSIAN09<sup>6</sup> software package.

**Table S1** The first IPs predicted by some MP2-based direct methods with the cc-pVQZ basis set.<sup>a</sup> KT-HF is also included for comparison.

|                        | KT-HF       | NKS-MP2     | EKT-MP2     | CRB-MP2     | Exp. <sup>b</sup> |
|------------------------|-------------|-------------|-------------|-------------|-------------------|
| Li                     | 5.34        | 5.36        | 5.36        | 5.36        | 5.39              |
| Be                     | 8.42        | 8.67        | 8.73        | 8.85        | 9.32              |
| B                      | 8.67        | 8.18        | 8.23        | 8.58        | 8.3               |
| C                      | 11.94       | 11.11       | 11.22       | 11.62       | 11.26             |
| N                      | 15.52       | 14.27       | 14.46       | 14.90       | 14.54             |
| O                      | 14.19       | 12.93       | 13.08       | 13.56       | 13.61             |
| F                      | 18.47       | 16.36       | 16.71       | 17.24       | 17.42             |
| F <sub>2</sub>         | 18.12       | 13.50       | 14.88       | 15.41       | 15.7              |
| OH                     | 13.94       | 12.00       | 12.35       | 12.90       | 13.01             |
| NH <sub>2</sub>        | 12.58       | 11.16       | 11.33       | 11.97       | 12.0              |
| CH <sub>3</sub>        | 10.47       | 9.21        | 9.44        | 10.02       | 9.84              |
| CN                     | 14.14       | 11.55       | 12.64       | 13.82       | 13.6              |
| O <sub>2</sub>         | 15.17       | 10.13       | 11.93       | 12.63       | 12.3              |
| <b>MAD<sup>c</sup></b> | <b>0.97</b> | <b>0.91</b> | <b>0.46</b> | <b>0.22</b> | --                |

<sup>a</sup> All energies are in eV.

<sup>b</sup> Experimental values are taken from Ref. 7.

<sup>c</sup> Mean absolute deviation.

**Table S2** Valence IPs predicted by some MP2-based direct methods with the aug-cc-pVTZ basis set.<sup>a</sup> KT-HF is also included for comparison.

| Molecule                      | Orb.       | KT-HF | NKS-MP2 | EKT-MP2 | CRB-MP2 | Exp. <sup>b</sup> |
|-------------------------------|------------|-------|---------|---------|---------|-------------------|
| N <sub>2</sub>                | $\sigma_g$ | 17.27 | 14.02   | 15.05   | 15.79   | 15.60             |
|                               | $\pi_u$    | 16.72 | 16.64   | 16.70   | 17.30   | 16.68             |
|                               | $\sigma_u$ | 21.22 | 16.96   | 18.52   | 18.96   | 18.78             |
| HF                            | $\pi$      | 17.70 | 14.48   | 15.42   | 15.64   | 16.19             |
|                               | $\sigma$   | 20.92 | 18.92   | 19.33   | 19.64   | 19.90             |
| CO                            | $\sigma$   | 15.10 | 13.19   | 13.64   | 14.48   | 14.01             |
|                               | $\pi$      | 17.43 | 16.24   | 16.36   | 16.96   | 16.85             |
| C <sub>2</sub> H <sub>2</sub> | $\sigma$   | 21.90 | 17.88   | 19.30   | 19.35   | 19.78             |
|                               | $\pi_u$    | 11.19 | 10.85   | 10.83   | 11.49   | 11.49             |
|                               | $\sigma_g$ | 18.56 | 15.90   | 16.73   | 17.33   | 16.70             |
| HCN                           | $\sigma_u$ | 20.91 | 17.75   | 18.84   | 19.28   | 18.70             |
|                               | $\pi$      | 13.50 | 13.19   | 13.17   | 13.85   | 13.61             |
|                               | $\sigma$   | 15.85 | 11.91   | 13.38   | 13.79   | 14.01             |
| HCCF                          | $\sigma^*$ | 22.16 | 19.34   | 20.24   | 20.83   | 19.86             |
|                               | $\pi$      | 11.38 | 10.77   | 10.75   | 11.54   | 11.50             |
|                               | $\pi$      | 20.69 | 15.97   | 17.84   | 17.75   | 18.00             |
| NNO                           | $\sigma$   | 19.78 | 17.04   | 17.88   | 18.51   | 18.00             |
|                               | $\sigma$   | 23.44 | 19.40   | 20.84   | 21.04   | 21.20             |
|                               | $\sigma$   | 28.63 | 23.36   | 26.71   | 25.63   | 24.30             |
| NCCN                          | $\pi$      | 13.38 | 11.70   | 11.92   | 12.93   | 12.89             |
|                               | $\sigma$   | 19.02 | 14.31   | 16.08   | 16.79   | 16.38             |
|                               | $\pi$      | 20.77 | 16.76   | 18.42   | 18.71   | 18.23             |
| CO <sub>2</sub>               | $\sigma$   | 22.70 | 17.44   | 19.58   | 19.47   | 20.11             |
|                               | $\pi_g$    | 13.58 | 12.90   | 12.83   | 13.82   | 13.51             |
|                               | $\sigma_g$ | 16.99 | 12.15   | 14.16   | 14.47   | 14.49             |
| OCS                           | $\sigma_u$ | 17.42 | 12.45   | 14.52   | 14.76   | 14.86             |
|                               | $\pi_u$    | 16.35 | 15.04   | 15.12   | 16.12   | 15.60             |
|                               | $\sigma_g$ | 26.63 | 21.16   | 24.33   | 23.82   | 22.80             |
| FCN                           | $\pi_g$    | 14.83 | 12.50   | 13.01   | 13.78   | 13.79             |
|                               | $\pi_u$    | 19.46 | 16.41   | 17.31   | 17.92   | 17.60             |
|                               | $\sigma_u$ | 20.24 | 16.14   | 17.53   | 17.93   | 18.08             |
| OCS                           | $\sigma_g$ | 21.81 | 17.26   | 18.91   | 19.13   | 19.40             |
|                               | $\pi$      | 11.48 | 10.60   | 10.66   | 11.41   | 11.24             |
|                               | $\pi^*$    | 17.93 | 14.27   | 15.56   | 16.03   | 15.53             |
| FCN                           | $\sigma$   | 17.34 | 15.07   | 15.65   | 16.43   | 16.04             |
|                               | $\sigma^*$ | 21.19 | 15.55   | 18.04   | 17.80   | 17.96             |
|                               | $\pi$      | 13.65 | 12.97   | 12.92   | 13.81   | 13.65             |
| FCN                           | $\sigma$   | 16.35 | 12.55   | 13.88   | 14.42   | 14.56             |
|                               | $\pi$      | 22.20 | 17.63   | 19.38   | 19.48   | 19.30             |
|                               | $\sigma$   | 25.30 | 21.27   | 22.70   | 22.98   | 22.60             |

|                               |            |       |       |       |       |       |
|-------------------------------|------------|-------|-------|-------|-------|-------|
|                               | $\pi$      | 12.99 | 12.14 | 12.26 | 12.72 | 12.77 |
| HCl                           | $\sigma$   | 17.02 | 16.17 | 16.28 | 16.77 | 16.60 |
|                               | $\sigma$   | 30.41 | 25.64 | 28.74 | 27.46 | 25.80 |
|                               | $\pi_g$    | 18.16 | 13.47 | 15.08 | 15.29 | 15.87 |
| F <sub>2</sub>                | $\pi_u$    | 22.10 | 16.17 | 18.37 | 18.35 | 18.80 |
|                               | $\sigma_g$ | 20.49 | 20.36 | 20.34 | 20.78 | 21.10 |
|                               | $\sigma$   | 12.82 | 9.95  | 10.91 | 11.74 | 11.34 |
| CS                            | $\pi$      | 12.61 | 12.67 | 12.95 | 13.08 | 12.90 |
|                               | $\sigma$   | 18.85 | 16.11 | 17.19 | 17.44 | 18.03 |
| P <sub>2</sub>                | $\pi_u$    | 10.12 | 10.15 | 10.11 | 10.61 | 10.65 |
|                               | $\sigma_g$ | 11.12 | 9.79  | 10.15 | 10.77 | 10.84 |
|                               | $b_1$      | 13.89 | 11.16 | 11.99 | 12.32 | 12.78 |
| H <sub>2</sub> O              | $a_1$      | 15.92 | 13.56 | 14.18 | 14.54 | 14.83 |
|                               | $b_2$      | 19.54 | 18.09 | 18.35 | 18.72 | 18.72 |
| CH <sub>4</sub>               | $t_2$      | 14.85 | 13.77 | 13.95 | 14.46 | 14.40 |
|                               | $a_1$      | 25.70 | 22.77 | 23.89 | 24.05 | 23.00 |
| NH <sub>3</sub>               | $a_1$      | 11.69 | 9.80  | 10.30 | 10.78 | 10.80 |
|                               | $e$        | 17.11 | 15.75 | 16.00 | 16.46 | 16.80 |
|                               | $b_2$      | 12.23 | 9.27  | 10.21 | 10.55 | 10.90 |
| CH <sub>2</sub> O             | $b_1$      | 14.25 | 13.58 | 13.58 | 14.13 | 14.50 |
|                               | $a_1$      | 17.38 | 14.23 | 15.21 | 15.55 | 16.10 |
|                               | $b_2$      | 19.41 | 16.45 | 17.66 | 17.80 | 17.00 |
|                               | $a_1$      | 23.97 | 20.69 | 21.94 | 22.18 | 21.40 |
|                               | $e$        | 12.55 | 11.90 | 11.87 | 12.64 | 12.46 |
| CH <sub>3</sub> CN            | $a_1$      | 15.13 | 11.18 | 12.65 | 13.04 | 13.17 |
|                               | $e$        | 17.10 | 15.46 | 15.85 | 16.46 | 15.70 |
|                               | $a_1$      | 18.93 | 16.00 | 16.97 | 17.56 | 17.40 |
|                               | $a_1$      | 28.27 | 23.66 | 26.04 | 25.71 | 24.90 |
|                               | $a_1$      | 16.02 | 13.75 | 14.26 | 14.82 | 14.80 |
|                               | $a_2$      | 17.94 | 13.97 | 15.21 | 15.47 | 15.50 |
|                               | $e$        | 18.41 | 14.77 | 15.84 | 16.15 | 16.20 |
| CHF <sub>3</sub>              | $e$        | 19.49 | 15.62 | 16.89 | 17.07 | 17.20 |
|                               | $e$        | 22.63 | 19.27 | 20.36 | 20.57 | 20.70 |
|                               | $a_1$      | 23.08 | 19.70 | 20.83 | 21.04 | 20.70 |
|                               | $a_1$      | 27.00 | 23.43 | 24.61 | 24.84 | 24.40 |
|                               | $e_g$      | 13.27 | 12.08 | 12.29 | 12.81 | 12.00 |
|                               | $a_{1g}$   | 13.76 | 12.01 | 12.44 | 13.06 | 12.70 |
|                               | $e_u$      | 16.22 | 14.71 | 15.05 | 15.53 | 15.00 |
| C <sub>2</sub> H <sub>6</sub> | $a_{2u}$   | 22.89 | 20.19 | 21.18 | 21.39 | 20.40 |
|                               | $a_{1g}$   | 27.63 | 23.42 | 25.77 | 25.16 | 23.90 |
|                               | $b_{3u}$   | 10.23 | 9.94  | 9.88  | 10.49 | 10.68 |
| C <sub>2</sub> H <sub>4</sub> | $b_{3g}$   | 13.84 | 12.31 | 12.66 | 13.20 | 12.80 |
|                               | $a_g$      | 15.93 | 13.75 | 14.39 | 14.98 | 14.80 |
|                               | $b_{2u}$   | 17.50 | 15.29 | 15.97 | 16.38 | 16.00 |

|                                  |                        |             |             |             |             |       |
|----------------------------------|------------------------|-------------|-------------|-------------|-------------|-------|
|                                  | $b_{1u}$               | 21.55       | 18.39       | 19.66       | 19.81       | 19.10 |
|                                  | $a_g$                  | 28.09       | 22.72       | 26.26       | 24.92       | 23.60 |
|                                  | $b_2$                  | 9.59        | 8.68        | 8.81        | 9.26        | 9.38  |
|                                  | $b_1$                  | 11.39       | 11.32       | 11.49       | 11.79       | 11.76 |
| H <sub>2</sub> CS                | $a_1$                  | 14.74       | 13.14       | 13.53       | 14.14       | 13.85 |
|                                  | $b_2$                  | 17.56       | 14.54       | 15.70       | 16.09       | 15.20 |
|                                  | $a_1$                  | 22.14       | 18.13       | 20.04       | 19.91       | 19.90 |
|                                  | $a'$                   | 12.70       | 10.09       | 10.76       | 11.80       | 11.82 |
|                                  | $a'$                   | 14.02       | 13.62       | 12.89       | 13.65       | 13.50 |
| NSF                              | $a''$                  | 15.05       | 11.96       | 13.45       | 14.22       | 13.87 |
|                                  | $a'$                   | 18.22       | 13.69       | 15.34       | 15.57       | 15.62 |
|                                  | $a''$                  | 19.12       | 14.15       | 16.51       | 15.99       | 16.47 |
|                                  | $a'$                   | 19.29       | 14.69       | 16.78       | 16.35       | 17.20 |
|                                  | $b_1$                  | 10.78       | 9.95        | 9.98        | 10.75       | 10.70 |
|                                  | $b_2$                  | 16.37       | 14.46       | 14.71       | 15.50       | 14.90 |
|                                  | $a_1$                  | 17.39       | 14.57       | 15.35       | 15.57       | 15.80 |
|                                  | $b_2$                  | 18.17       | 14.04       | 15.65       | 15.94       | 16.10 |
| CH <sub>2</sub> =CF <sub>2</sub> | $a_2$                  | 18.78       | 14.40       | 15.97       | 16.02       | 16.10 |
|                                  | $a_1$                  | 20.46       | 16.62       | 18.10       | 18.12       | 18.20 |
|                                  | $b_1$                  | 20.76       | 16.55       | 18.14       | 18.15       | 18.20 |
|                                  | $b_2$                  | 21.85       | 18.26       | 19.53       | 19.66       | 19.70 |
|                                  | $a_1$                  | 24.13       | 20.12       | 21.60       | 21.68       | 21.50 |
|                                  | <b>MAD<sup>c</sup></b> | <b>1.68</b> | <b>1.19</b> | <b>0.53</b> | <b>0.37</b> | -     |

<sup>a</sup> All energies are in eV.

<sup>b</sup> Experimental values are taken from Ref. 4.

<sup>c</sup> Mean absolute deviation.

**Table S3** Core IPs predicted by some MP2-based direct methods with the aug-cc-pVTZ basis set.<sup>a</sup> KT-HF is also included for comparison.

| Molecule                         | Orb.            | KT-HF  | NKS-MP2 | EKT-MP2 | CRB-MP2 | Exp. <sup>b</sup> |
|----------------------------------|-----------------|--------|---------|---------|---------|-------------------|
| N <sub>2</sub>                   | N <sub>1s</sub> | 426.83 | 401.02  | 424.63  | 410.58  | 409.90            |
|                                  | N <sub>1s</sub> | 426.74 | 400.97  | 424.38  | 410.51  | 409.90            |
| HF                               | F <sub>1s</sub> | 715.65 | 680.10  | 711.39  | 691.94  | 694.22            |
| CO                               | O <sub>1s</sub> | 562.42 | 528.38  | 560.97  | 539.86  | 542.57            |
|                                  | C <sub>1s</sub> | 309.17 | 293.53  | 305.80  | 299.67  | 296.20            |
| C <sub>2</sub> H <sub>2</sub>    | C <sub>1s</sub> | 305.96 | 284.86  | 304.50  | 292.69  | 291.20            |
|                                  | C <sub>1s</sub> | 305.86 | 284.79  | 304.29  | 292.61  | 291.20            |
| HCN                              | N <sub>1s</sub> | 424.53 | 395.29  | 422.63  | 405.90  | 406.15            |
|                                  | C <sub>1s</sub> | 307.31 | 288.58  | 305.38  | 295.66  | 293.50            |
| NNO                              | O <sub>1s</sub> | 562.15 | 525.55  | 561.11  | 537.77  | 541.42            |
|                                  | N <sub>1s</sub> | 431.20 | 403.38  | 427.98  | 414.27  | 412.50            |
|                                  | N <sub>1s</sub> | 427.21 | 397.47  | 423.98  | 408.75  | 408.60            |
| NCCN                             | N <sub>1s</sub> | 426.01 | 395.24  | 424.24  | 406.51  | 407.40            |
|                                  | N <sub>1s</sub> | 426.01 | 395.24  | 423.79  | 406.51  | 407.40            |
|                                  | C <sub>1s</sub> | 309.00 | 289.53  | 309.43  | 296.87  | 294.50            |
|                                  | C <sub>1s</sub> | 308.97 | 289.49  | 307.04  | 296.84  | 294.50            |
| CO <sub>2</sub>                  | O <sub>1s</sub> | 562.01 | 526.85  | 560.63  | 538.95  | 541.28            |
|                                  | C <sub>1s</sub> | 311.91 | 294.85  | 308.90  | 301.92  | 297.65            |
| OCS                              | O <sub>1s</sub> | 562.16 | 523.94  | 560.47  | 537.05  | 540.30            |
|                                  | C <sub>1s</sub> | 311.26 | 290.07  | 308.10  | 298.64  | 295.20            |
| F <sub>2</sub>                   | F <sub>1s</sub> | 719.30 | 681.43  | 717.22  | 694.30  | 696.71            |
|                                  | F <sub>1s</sub> | 719.29 | 681.43  | 711.46  | 694.30  | 696.71            |
| H <sub>2</sub> O                 | O <sub>1s</sub> | 559.67 | 527.24  | 558.21  | 538.35  | 539.88            |
| CH <sub>4</sub>                  | C <sub>1s</sub> | 304.90 | 286.11  | 303.58  | 293.03  | 290.83            |
| NH <sub>3</sub>                  | N <sub>1s</sub> | 422.92 | 396.48  | 421.34  | 405.84  | 405.60            |
| CH <sub>2</sub> O                | O <sub>1s</sub> | 559.87 | 524.04  | 558.42  | 536.16  | 539.44            |
|                                  | C <sub>1s</sub> | 308.44 | 290.86  | 306.90  | 297.53  | 294.47            |
| CH <sub>3</sub> CN               | N <sub>1s</sub> | 423.73 | 394.22  | 422.02  | 404.82  | 405.60            |
|                                  | C <sub>1s</sub> | 307.25 | 288.14  | 305.98  | 295.25  | 293.20            |
|                                  | C <sub>1s</sub> | 306.93 | 287.58  | 305.07  | 294.82  | 293.10            |
| CHF <sub>3</sub>                 | F <sub>1s</sub> | 717.01 | 680.83  | 715.30  | 692.86  | 694.62            |
|                                  | F <sub>1s</sub> | 717.01 | 680.83  | 715.30  | 692.86  | 694.62            |
|                                  | F <sub>1s</sub> | 717.01 | 680.83  | 715.27  | 692.86  | 694.62            |
|                                  | C <sub>1s</sub> | 313.20 | 296.70  | 312.46  | 303.04  | 299.24            |
| C <sub>2</sub> H <sub>6</sub>    | C <sub>1s</sub> | 305.10 | 285.82  | 303.83  | 292.85  | 290.71            |
|                                  | C <sub>1s</sub> | 305.08 | 285.80  | 303.49  | 292.83  | 290.71            |
| C <sub>2</sub> H <sub>4</sub>    | C <sub>1s</sub> | 305.69 | 285.22  | 304.46  | 292.73  | 290.88            |
|                                  | C <sub>1s</sub> | 305.65 | 285.18  | 304.28  | 292.68  | 290.88            |
| CH <sub>2</sub> =CF <sub>2</sub> | F <sub>1s</sub> | 716.98 | 679.98  | 715.45  | 692.25  | 694.44            |
|                                  | F <sub>1s</sub> | 716.98 | 679.97  | 715.24  | 692.25  | 694.44            |
|                                  | C <sub>1s</sub> | 311.01 | 291.73  | 309.19  | 299.02  | 296.10            |

|                          | $C_{1s}$ | 306.01       | 286.19      | 304.66       | 293.51      | 291.33 |
|--------------------------|----------|--------------|-------------|--------------|-------------|--------|
| <b>MAD_n<sup>c</sup></b> |          | <b>17.56</b> | <b>9.24</b> | <b>15.60</b> | <b>2.06</b> | --     |
| <b>MAD_r<sup>d</sup></b> |          | <b>17.88</b> | <b>8.92</b> | <b>15.92</b> | <b>1.92</b> | --     |

<sup>a</sup> All energies are in eV.

<sup>b</sup> Experimental values are taken from Ref. 8.

<sup>c</sup> Mean absolute deviations calculated without relativistic effect corrections.

<sup>d</sup> Mean absolute deviations calculated with relativistic effect corrections.<sup>9</sup>



## REFERENCES

- 1 A. J. Cohen, P. Mori-Sanchez, and W. Yang, Second-order perturbation theory with fractional charges and fractional spins. *J. Chem. Theory Comput.* 2009, **5**, 786-792.
- 2 T. H. Dunning, Jr. Gaussian basis sets for use in correlated molecular calculations. I. The atoms boron through neon and hydrogen. *J. Chem. Phys.* 1989, **90**, 1007-1023.
- 3 D. E. Woon, and T. H. Dunning, Jr. Gaussian basis sets for use in correlated molecular calculations. III. The atoms aluminum through argon. *J. Chem. Phys.* 1993, **100**, 2975-2988.
- 4 U. Bozkaya, The extended Koopmans' theorem for orbital-optimized methods: Accurate computation of ionization potentials. *J. Chem. Phys.* 2013, **139**, 154105.
- 5 Y. Gu, and X. Xu, Extended Koopmans' theorem at the second order perturbation theory. *J. Comput. Chem.* 2020, **41**, 1165-1174.
- 6 M. J. Frisch, G. W. Trucks, H. B. Schlegel, G. E. Scuseria, M. A. Robb, J. R. Cheeseman, G. Scalmani, V. Barone, B. Mennucci, G. A. Petersson, et al. *Gaussian 09, Revision C.01*; Gaussian, Inc.: Wallingford, CT, 2010.
- 7 N. Q. Su, and X. Xu, Integration approach at the second-order perturbation theory: applications to ionization potential and electron affinity calculations. *J. Chem. Theory Comput.* 2015, **11**, 4677-4688.
- 8 W. L. Jolly, K. D. Bomben, and C. J. Eyermann, Core-electron binding energies for gaseous atoms and molecules. *At. Data Nucl. Data Tables* 1984, **31**, 433-493.
- 9 N. P. Bellafont, F. Vines, and F. Illas, Performance of the TPSS functional on predicting core level binding energies of main group elements containing molecules: a good choice for molecules adsorbed on metal surfaces. *J. Chem. Theory Comput.* 2016, **12**, 324-331.
